# Supplementary material for: Muscle pathology of antisynthetase syndrome according to antibody subtypes
Source: bioRxiv or medRxiv preprint supplement (doi:10.1101/2022.04.25.22274260), 2022-04-28
Supplement: Supplementary file [file media-1.pdf]

**Supplementary eTable 1 Additional clinical features of antisynthetase syndrome in this study**

|                                     | <b>Anti-ARS antibody</b>    |                         |                       |                         |                          |                       |                      |                            |
|-------------------------------------|-----------------------------|-------------------------|-----------------------|-------------------------|--------------------------|-----------------------|----------------------|----------------------------|
|                                     | <b>All ARS</b><br>(n = 212) | <b>Jo-1</b><br>(n = 65) | <b>OJ</b><br>(n = 20) | <b>PL-7</b><br>(n = 20) | <b>PL-12</b><br>(n = 11) | <b>EJ</b><br>(n = 10) | <b>KS</b><br>(n = 1) | <b>ARS_NOS</b><br>(n = 85) |
| Adult ( $\geq$ 18 years old)        | 208 (98.1)                  | 64 (98.5)               | 20 (100.0)            | 19 (95.0)               | 11 (100.0)               | 10 (100.0)            | 0                    | 84 (98.8)                  |
| Woman                               | 128 (60.4)                  | 40 (61.5)               | 9 (45.0)              | 11 (55.0)               | 5 (45.5)                 | 6 (60.0)              | 1 (100.0)            | 56 (65.9)                  |
| Immunotherapy at the time of biopsy | 53 (25.0)                   | 12 (18.5)               | 6 (30.0)              | 5 (25.0)                | 2 (18.2)                 | 1 (10.0)              | 0                    | 27 (31.8)                  |
| Malignancy                          | 17 (8.0)                    | 6 (9.2)                 | 3 (15.0)              | 0                       | 1 (9.1)                  | 0                     | 0                    | 7 (8.2)                    |

Continuous data is shown as mean and  $\pm$  standard deviation while categorical data is reported as number and (percentage).

Abbreviations: ARS, anti-tRNA synthetase; NOS, not otherwise specified.

**Supplementary eTable 2 Muscle fiber domain scores in antisynthetase syndrome**

|                                      | <b>Anti-ARS antibody</b>    |                         |                       |                         |                          |                       |                      |                            |
|--------------------------------------|-----------------------------|-------------------------|-----------------------|-------------------------|--------------------------|-----------------------|----------------------|----------------------------|
|                                      | <b>All ARS</b><br>(n = 212) | <b>Jo-1</b><br>(n = 65) | <b>OJ</b><br>(n = 20) | <b>PL-7</b><br>(n = 20) | <b>PL-12</b><br>(n = 11) | <b>EJ</b><br>(n = 10) | <b>KS</b><br>(n = 1) | <b>ARS_NOS</b><br>(n = 85) |
| <b>Muscle fiber domain</b>           |                             |                         |                       |                         |                          |                       |                      |                            |
| Total Score                          | 3.0±1.8                     | 2.5±1.4*                | 4.6±2.0*              | 3.1±2.1                 | 2.5±1.9                  | 4.7±2.1*              | 4.0                  | 2.8±1.7                    |
| Necrotic fiber score                 | 1.1±0.8                     | 0.9±0.7*                | 1.7±0.6*              | 1.3±0.6                 | 0.7±0.8                  | 1.3±0.8               | 2.0                  | 2.5±1.4                    |
| Regenerating fiber score             | 0.6±0.5                     | 0.6±0.5                 | 0.9±0.4*              | 0.6±0.5                 | 0.4±0.5                  | 0.8±0.4               | 1.0                  | 0.6±0.5                    |
| Atrophic fiber score                 | 0.7±0.8                     | 0.6±0.7*                | 1.0±0.9               | 0.7±0.9                 | 0.8±0.9                  | 1.2±0.8               | 0                    | 0.7±0.8                    |
| PFA score                            | 0.2±0.6                     | 0.1±0.4*                | 0.7±0.9*              | 0.3±0.7                 | 0.3±0.6                  | 0.8±0.8               | 1.0                  | 0.2±0.5                    |
| Fiber with internalized nuclei score | 0.3±0.5                     | 0.3±0.5                 | 0.3±0.5               | 0.2±0.4                 | 0.3±0.5                  | 0.6±0.5               | 0                    | 0.2±0.4                    |
| Fiber with internalized nuclei >3%   | 60 (28.3)                   | 22 (33.8)               | 6 (30.0)              | 4 (21.1)                | 3 (27.3)                 | 6 (54.5)              | 0                    | 19 (22.4)                  |

Continuous data is shown as mean and ± standard deviation while categorical data is reported as number and (percentage).

Abbreviations: ARS, anti-tRNA synthetase; NOS, not otherwise specified; PFA, perifascicular atrophy

\*p < 0.05 compared to the other antibody subtypes

**Supplementary eTable 3 Inflammatory domain in antisynthetase syndrome**

|                                                   | Anti-ARS antibody    |                      |                |                  |                       |                |               |                      |
|---------------------------------------------------|----------------------|----------------------|----------------|------------------|-----------------------|----------------|---------------|----------------------|
|                                                   | All ARS<br>(n = 212) | Jo-1<br>(n = 65)     | OJ<br>(n = 20) | PL-7<br>(n = 20) | PL-12<br>(n = 11)     | EJ<br>(n = 10) | KS<br>(n = 1) | ARS_NOS<br>(n = 85)  |
| <b>Inflammatory domain</b>                        |                      |                      |                |                  |                       |                |               |                      |
| Total Score                                       | 4.9±3.0 <sup>a</sup> | 4.9±3.2 <sup>b</sup> | 6.8±3.2*       | 4.2±1.9          | 2.6±1.5 <sup>c*</sup> | 4.5±3.0        | 2.0           | 5.0±3.0 <sup>b</sup> |
| Endomysial CD3 infiltration                       | 0.7±0.8 <sup>a</sup> | 0.8±0.8 <sup>b</sup> | 1.1±0.9        | 0.8±0.5          | 0.1±0.3 <sup>c*</sup> | 0.7±0.8        | 0             | 0.7±0.7 <sup>b</sup> |
| Perimysial CD3 infiltration                       | 0.3±0.6 <sup>a</sup> | 0.3±0.7 <sup>b</sup> | 0.6±0.7        | 0*               | 0 <sup>c*</sup>       | 0.2±0.4        | 0             | 0.3±0.6 <sup>b</sup> |
| Endomysial CD20 infiltration                      | 0.4±0.7 <sup>a</sup> | 0.5±0.7 <sup>b</sup> | 0.7±0.7        | 0.4±0.6          | 0.1±0.3 <sup>c*</sup> | 0.2±0.4        | 0             | 0.4±0.7 <sup>b</sup> |
| Perimysial CD20 infiltration                      | 0.2±0.5 <sup>a</sup> | 0.2±0.5 <sup>b</sup> | 0.3±0.6        | 0.2±0.4          | 0 <sup>c*</sup>       | 0.1±0.3        | 0             | 0.3±0.6 <sup>b</sup> |
| Endomysial CD68 infiltration                      | 1.6±0.5 <sup>a</sup> | 1.6±0.6 <sup>b</sup> | 1.9±0.4*       | 1.7±0.5          | 1.3±0.7 <sup>c</sup>  | 1.7±0.7        | 0             | 1.6±0.5 <sup>b</sup> |
| Perimysial CD68 infiltration                      | 1.1±0.8 <sup>a</sup> | 1.0±0.8 <sup>b</sup> | 1.6±0.7*       | 0.8±0.8          | 0.8±0.7 <sup>c</sup>  | 1.2±0.9        | 0             | 1.3±0.7 <sup>b</sup> |
| Perivascular inflammatory cell infiltration score | 0.4±0.5              | 0.4±0.5              | 0.8±0.4*       | 0.4±0.5          | 0.2±0.4               | 0.4±0.5        | 0             | 0.4±0.5              |
| Perivascular inflammatory cell infiltration       | 87 (41.0)            | 26 (40.0)            | 15 (75.0)*     | 7 (35.0)         | 2 (18.2)              | 4 (40.0)       | 0             | 33 (38.8)            |

Categorical data is reported as number and (percentage).

Abbreviations: ARS, anti-tRNA synthetase; nos, not otherwise specified; PM-Fr, perimysial fragmentation; PM-ALP, increased perimysial alkaline phosphatase activity; NOS, not otherwise specified.

<sup>a</sup>Four cases were excluded from the analysis due to artifacts

<sup>b</sup>One case was excluded from the analysis due to artifacts

<sup>c</sup>Two cases were excluded from the analysis due to artifacts

\*p < 0.05 compared to the other antibody subtypes

**Supplementary eTable 4 Additional histological features of interest**

|                                             | Anti-ARS antibody    |                  |                |                  |                   |                |               | ARS_NOS<br>(n = 85) |
|---------------------------------------------|----------------------|------------------|----------------|------------------|-------------------|----------------|---------------|---------------------|
|                                             | All ARS<br>(n = 212) | Jo-1<br>(n = 65) | OJ<br>(n = 20) | PL-7<br>(n = 20) | PL-12<br>(n = 11) | EJ<br>(n = 10) | KS<br>(n = 1) |                     |
| CD8 infiltration in non-necrotic fiber      | 1 (0.5)              | 0                | 0              | 0                | 0                 | 0              | 0             | 1 (1.2)             |
| CD68/ACP infiltration in non-necrotic fiber | 7 (3.3)              | 2 (3.1)          | 1 (5.0)        | 1 (5.3)          | 0                 | 1 (9.1)        | 0             | 2 (2.4)             |
| CD20 aggregation                            | 10 (4.7)             | 4 (6.2)          | 1 (5.0)        | 1 (5.3)          | 0                 | 0              | 0             | 4 (4.7)             |

Categorical data is reported as number and (percentage).

Abbreviations: ARS, anti-tRNA synthetase; ACP, acid phosphatase; CD, cluster of differentiation; NOS, not otherwise specified

\* $p < 0.05$  compared to the other antibody subtypes

**Supplementary eTable 5 HLA-DR expression patterns in ASS**

|                                           | Anti-ARS antibody    |                  |                |                  |                   |                |               |                     |
|-------------------------------------------|----------------------|------------------|----------------|------------------|-------------------|----------------|---------------|---------------------|
|                                           | All ARS<br>(n = 212) | Jo-1<br>(n = 65) | OJ<br>(n = 20) | PL-7<br>(n = 20) | PL-12<br>(n = 11) | EJ<br>(n = 10) | KS<br>(n = 1) | ARS_NOS<br>(n = 85) |
| HLA-DR expression                         | 128 (60.4)           | 44 (67.7)        | 13 (65.0)      | 10 (50.0)        | 5 (45.5)          | 5 (50.0)       | 1 (100.0)     | 50 (58.8)           |
| Pattern 1                                 | 19 (9.0)             | 1 (1.5)*         | 2 (10.0)       | 1 (5.0)          | 3 (27.3)*         | 2 (20.0)       | 0             | 10 (11.8)           |
| Pattern 1+                                | 3 (1.4)              | 1 (1.5)          | 1 (5.0)        | 0                | 0                 | 0              | 0             | 1 (1.2)             |
| Pattern 2                                 | 13 (6.1)             | 1 (1.5)*         | 3 (15.0)       | 2 (10.0)         | 0                 | 0              | 0             | 7 (8.2)             |
| Pattern 3                                 | 14 (6.6)             | 2 (3.1)          | 1 (5.0)        | 4 (20.0)*        | 0                 | 0              | 1 (100.0)     | 6 (7.1)             |
| Pattern 4                                 | 60 (28.3)            | 30 (46.2)*       | 4 (20.0)       | 3 (15.0)         | 2 (18.2)          | 2 (10.0)       | 0             | 19 (22.4)           |
| Pattern 5                                 | 19 (9.0)             | 9 (13.8)         | 2 (10.0)       | 0                | 0                 | 1 (10.0)       | 0             | 7 (8.2)             |
| “Possible” perifascicular pattern (3+4+5) | 93 (43.9)            | 41 (63.1)*       | 7 (35.0)       | 7 (35.0)         | 2 (18.2)          | 3 (30.0)       | 1 (100.0)     | 32 (37.6)           |
| Perifascicular pattern (4+5)              | 79 (37.3)            | 39 (60.0)*       | 6 (30.0)       | 3 (15.0)*        | 2 (18.2)          | 3 (30.0)       | 0             | 26 (30.6)           |

Categorical data is reported as number and (percentage).

Abbreviations: ARS, anti-tRNA synthetase; HLA, human leukocyte antigen; NOS, not otherwise specified

\*p < 0.05 compared to the other antibody subtypes

**Supplementary eTable6 Myopathology patterns and HLA-DR expression pattern 4 and 5**

|                                  | Anti-ARS antibody                 |                      |                |                  |                   |                |               |                                  |
|----------------------------------|-----------------------------------|----------------------|----------------|------------------|-------------------|----------------|---------------|----------------------------------|
|                                  | All ARS<br>(n = 210) <sup>a</sup> | Jo-1<br>(n = 65)     | OJ<br>(n = 20) | PL-7<br>(n = 20) | PL-12<br>(n = 11) | EJ<br>(n = 10) | KS<br>(n = 1) | ARS_NOS<br>(n = 83) <sup>a</sup> |
| <b>Pattern 4</b>                 |                                   |                      |                |                  |                   |                |               |                                  |
| Normal/non-specific              | 6 (2.9)                           | 3(4.6)               | 0              | 0                | 0                 | 0              | 0             | 3 (3.6)                          |
| Necrotizing myopathy without PFN | 29 (13.8)                         | 14 (21.5)            | 2 (10.0)       | 1 (5.3)          | 2 (18.2)          | 0              | 0             | 10 (12.0)                        |
| Necrotizing myopathy with PFN    | 24 (11.4)                         | 12 (18.5)            | 2 (10.0)       | 2 (10.5)         | 0                 | 2 (18.2)       | 0             | 6 (7.2)                          |
| Others                           | 1 (0.5)                           | 1 (1.5) <sup>b</sup> | 0              | 0                | 0                 | 0              | 0             | 0                                |
| <b>Pattern 5</b>                 |                                   |                      |                |                  |                   |                |               |                                  |
| Normal/non-specific              | 1 (0.5)                           | 0                    | 0              | 0                | 0                 | 1 (9.1)        | 0             | 0                                |
| Necrotizing myopathy without PFN | 7 (3.3)                           | 2 (3.1)              | 1 (5.0)        | 0                | 0                 | 0              | 0             | 4 (4.8)                          |
| Necrotizing myopathy with PFN    | 11 (5.2)                          | 7 (10.8)             | 1 (5.0)        | 0                | 0                 | 0              | 0             | 3 (3.6)                          |
| Others                           | 0                                 | 0                    | 0              | 0                | 0                 | 0              | 0             | 0                                |

Categorical data is reported as number and (percentage). \* $p < 0.05$  compared to the other antibody subtypes

Abbreviations: ARS, anti-tRNA synthetase; NOS, not otherwise specified; PFN, perifascicular necrosis

<sup>a</sup>Two cases of ARS, nos were excluded from the analysis due to artifacts

<sup>b</sup>Neurogenic muscle biopsy

**Supplementary eTable 7 HLA-DR expression patterns in non-ASS AIM and P-MM**

|                                           | Non-ASS AIM (n = 602) |                   |                  | P-MM (n = 140)   |                 |                  |                 |                 |                  |
|-------------------------------------------|-----------------------|-------------------|------------------|------------------|-----------------|------------------|-----------------|-----------------|------------------|
|                                           | DM<br>(n = 188)       | IMNM<br>(n = 313) | IBM<br>(n = 101) | DYSF<br>(n = 50) | SGP<br>(n = 15) | LMNA<br>(n = 16) | ANO5<br>(n = 3) | FKRP<br>(n = 9) | FSHD<br>(n = 47) |
| HLA-DR expression                         | 28 (14.9)*            | 20 (6.4)*         | 99 (98.0)*       | 0                | 0               | 0                | 0               | 0               | 1 (2.1)*         |
| Pattern 1                                 | 3 (1.6)               | 11 (3.5)          | 30 (29.7)        | 0                | 0               | 0                | 0               | 0               | 1 (2.1)          |
| Pattern 1+                                | 0                     | 0                 | 65 (64.4)        | 0                | 0               | 0                | 0               | 0               | 0                |
| Pattern 2                                 | 4 (2.1)               | 3 (1.0)           | 1 (1.0)          | 0                | 0               | 0                | 0               | 0               | 0                |
| Pattern 3                                 | 7 (3.7)               | 2 (0.6)           | 0                | 0                | 0               | 0                | 0               | 0               | 0                |
| Pattern 4                                 | 10 (5.3)              | 4 (1.3)           | 0                | 0                | 0               | 0                | 0               | 0               | 0                |
| Pattern 5                                 | 4 (2.1)               | 0                 | 3 (3.0)          | 0                | 0               | 0                | 0               | 0               | 0                |
| “Possible” perifascicular pattern (3+4+5) | 21 (11.2)             | 6 (1.9)           | 3 (3.0)          | 0                | 0               | 0                | 0               | 0               | 0                |
| Perifascicular pattern (4+5)              | 14 (7.4)              | 4(1.3)            | 3 (3.0)          | 0                | 0               | 0                | 0               | 0               | 0                |

Categorical data is reported as number and (percentage).

**Abbreviations:** AIM, autoimmune myositis; ASS, antisynthetase syndrome; P-MM, possible myositis mimics; DM, dermatomyositis; IMNM, immune mediated necrotizing myopathy; IBM, inclusion body myositis; DYSF, dysferlinopathy; SGP, sarcoglycanopathy; LMNA, laminopathy; ANO5, anoctamin5 myopathy; FKRP, fukutin-related protein myopathy; FSHD, facioscapulohumeral disease

\* $p < 0.05$  compared to ASS

**Supplementary eTable 8 Sensitivity, specificity, positive- and negative predictive value of HLA-DR expression in ASS**

|                                                                                                                                                                | <b>ASS<br/>(n=212)</b>                 | <b>Non-ASS<sup>a</sup><br/>(n=742)</b>    | <b>Sensitivity</b> | <b>Specificity</b> | <b>PPV</b> | <b>NPV</b> |
|----------------------------------------------------------------------------------------------------------------------------------------------------------------|----------------------------------------|-------------------------------------------|--------------------|--------------------|------------|------------|
| HLA-DR expression                                                                                                                                              | 128 (60.4)                             | 148 (19.9)                                | 60.4%              | 80.1%              | 46.4%      | 87.6%      |
| Considering ASS vs other entities excluding MxA-positive muscle biopsies and muscle biopsies from patient clinico-pathologically compatible with IBM           |                                        |                                           |                    |                    |            |            |
|                                                                                                                                                                | <b>ASS<sup>b</sup><br/>(n=209)</b>     | <b>Non-ASS<sup>c</sup><br/>(n=453)</b>    | <b>Sensitivity</b> | <b>Specificity</b> | <b>PPV</b> | <b>NPV</b> |
| HLA-DR expression                                                                                                                                              | 128 (61.2)                             | 21 (4.6)                                  | 61.2%              | 95.4%              | 85.9%      | 84.2%      |
| HLA-DR 3+4+5                                                                                                                                                   | 93 (44.5)                              | 6 (1.3)                                   | 44.5%              | 98.7%              | 93.9%      | 79.4%      |
| HLA-DR 4+5                                                                                                                                                     | 79 (37.8)                              | 4 (0.9)                                   | 37.8%              | 99.1%              | 95.2%      | 77.5%      |
| Considering anti-Jo-1 ASS vs other entities excluding MxA-positive muscle biopsies and muscle biopsies from patient clinico-pathologically compatible with IBM |                                        |                                           |                    |                    |            |            |
|                                                                                                                                                                | <b>Jo-1 ASS<br/>(n=64)<sup>d</sup></b> | <b>Non-Jo-1<sup>c,e</sup><br/>(n=513)</b> | <b>Sensitivity</b> | <b>Specificity</b> | <b>PPV</b> | <b>NPV</b> |
| HLA-DR 3+4+5                                                                                                                                                   | 41 (54.1)                              | 26 (5.1)                                  | 64.1%              | 94.9%              | 61.2%      | 95.5%      |
| HLA-DR 4+5                                                                                                                                                     | 39 (60.9)                              | 18 (3.5)                                  | 60.9%              | 96.5%              | 68.4%      | 95.2%      |

<sup>a</sup>Non-ASS include DM=188, IMNM=313, IBM=101, P-MM=140

<sup>b</sup>Exclude 3 MxA-positive ASS: anti-Jo-1 = 1; anti-OJ = 1; anti-PL-7=1

<sup>c</sup>Exclude DM=188 and IBM=101

<sup>d</sup>Exclude 1 MxA-positive anti-Jo-1 ASS

<sup>e</sup>Exclude 2 MxA-positive ASS: anti-OJ = 1 and anti-PL-7=1

Abbreviation: HLA, human leukocyte antigen; ASS, antisynthetase syndrome; PPV, positive predictive value; NPV, negative predictive value; MxA, Myxovirus resistant protein A; DM, dermatomyositis; IMNM, immune mediated necrotizing myopathy; IBM, inclusion body myositis



**Supplementary eTable 9 Expression levels of the 10 most significantly expressed genes of the IFN-signaling pathway and *CIITA* in different subtypes of inflammatory myopathy**

| <b>Jo-1</b>   |             |                       | <b>OJ</b>     |             |                       | <b>IBM</b>      |             |             | <b>HMGCR</b>    |             |                       | <b>SRP</b>    |             |                       |
|---------------|-------------|-----------------------|---------------|-------------|-----------------------|-----------------|-------------|-------------|-----------------|-------------|-----------------------|---------------|-------------|-----------------------|
| <b>Gene</b>   | <b>L2FC</b> | <b>padj</b>           | <b>Gene</b>   | <b>L2FC</b> | <b>padj</b>           | <b>Gene</b>     | <b>L2FC</b> | <b>padj</b> | <b>Gene</b>     | <b>L2FC</b> | <b>padj</b>           | <b>Gene</b>   | <b>L2FC</b> | <b>padj</b>           |
| <i>PSMB8</i>  | 3.75        | 2.62E-51              | <i>PSMB8</i>  | 3.22        | 1.89E-38              | <i>PSMB8</i>    | 3.44        | 4.79E-36    | <i>IFI30</i>    | 3.89        | 7.25E-16              | <i>IFI30</i>  | 3.83        | 1.59E-15              |
| <i>B2M</i>    | 2.76        | 1.04E-35              | <i>IFI30</i>  | 5.45        | 1.32E-35              | <i>B2M</i>      | 2.56        | 6.97E-26    | <i>FCGR1A</i>   | 4.65        | 3.36E-11              | <i>TRIM14</i> | 2.59        | 8.26E-12              |
| <i>IRF9</i>   | 2.68        | 2.04E-29              | <i>B2M</i>    | 2.47        | 1.73E-29              | <i>HLA-A</i>    | 2.63        | 2.16E-22    | <i>NCAM1</i>    | 3.48        | 2.63E-10              | <i>PSMB8</i>  | 1.76        | 2.38E-10              |
| <i>IRF1</i>   | 3.51        | 7.17E-28              | <i>TRIM14</i> | 3.71        | 3.04E-27              | <i>GBP6</i>     | 7.49        | 7.03E-22    | <i>IRF5</i>     | 2.28        | 4.57E-10              | <i>IRF9</i>   | 1.64        | 3.56E-10              |
| <i>HLA-A</i>  | 2.61        | 2.39E-26              | <i>ICAM1</i>  | 3.24        | 2.14E-25              | <i>HLA-F</i>    | 2.88        | 4.48E-21    | <i>TRIM14</i>   | 2.36        | 7.70E-10              | <i>IRF5</i>   | 2.22        | 1.20E-09              |
| <i>ICAM1</i>  | 3.35        | 2.94E-26              | <i>FCGR1A</i> | 6.54        | 5.99E-25              | <i>HLA-B</i>    | 3.11        | 9.45E-21    | <i>OAS1</i>     | 2.49        | 1.37E-09              | <i>OAS1</i>   | 2.47        | 1.74E-09              |
| <i>GBP1</i>   | 4.19        | 5.63E-26              | <i>IFI6</i>   | 3.89        | 1.89E-21              | <i>HLA-E</i>    | 1.84        | 5.18E-19    | <i>IRF8</i>     | 2.79        | 4.69E-09              | <i>IRF7</i>   | 1.96        | 3.22E-09              |
| <i>HLA-F</i>  | 2.92        | 9.82E-26              | <i>SAMHD1</i> | 2.06        | 5.92E-21              | <i>HLA-DRA</i>  | 3.68        | 1.55E-18    | <i>TRIM38</i>   | 1.61        | 5.68E-09              | <i>IRF8</i>   | 2.79        | 4.67E-09              |
| <i>IFI30</i>  | 4.67        | 1.08E-25              | <i>HLA-A</i>  | 2.25        | 1.75E-20              | <i>HLA-DPA1</i> | 3.38        | 1.64E-18    | <i>OASL</i>     | 2.98        | 6.43E-09              | <i>OAS2</i>   | 2.28        | 1.11E-08              |
| <i>HLA-B</i>  | 2.87        | 4.27E-21              | <i>VCAM1</i>  | 3.56        | 2.00E-20              | <i>HLA-DPB1</i> | 3.57        | 2.40E-18    | <i>HLA-DPA1</i> | 2.19        | 1.46E-08              | <i>VCAM1</i>  | 2.42        | 1.91E-08              |
| <i>CIITA</i>  | 2.43        | 6.53E-13              | <i>CIITA</i>  | 1.80        | 5.71E-08              | <i>CIITA</i>    | 2.58        | 2.10E-12    | <i>CIITA</i>    | 1.29        | 7.40x10 <sup>-4</sup> | <i>CIITA</i>  | 1.04        | 6.75x10 <sup>-3</sup> |
| <b>TIF1-g</b> |             |                       | <b>Mi-2</b>   |             |                       | <b>MDA5</b>     |             |             | <b>NXP-2</b>    |             |                       |               |             |                       |
| <b>Gene</b>   | <b>L2FC</b> | <b>padj</b>           | <b>Gene</b>   | <b>L2FC</b> | <b>padj</b>           | <b>Gene</b>     | <b>L2FC</b> | <b>padj</b> | <b>Gene</b>     | <b>L2FC</b> | <b>padj</b>           | <b>Gene</b>   | <b>L2FC</b> | <b>padj</b>           |
| <i>ISG15</i>  | 8.20        | 9.96E-63              | <i>IFI6</i>   | 6.48        | 9.84E-54              | <i>ISG15</i>    | 7.68        | 5.38E-66    | <i>ISG15</i>    | 8.04        | 8.69E-93              | <i>IFI6</i>   | 6.74        | 4.24E-84              |
| <i>IFI6</i>   | 7.13        | 2.93E-61              | <i>OAS1</i>   | 5.51        | 4.26E-48              | <i>IFI6</i>     | 6.70        | 8.76E-65    | <i>IFI6</i>     | 6.74        | 4.24E-84              | <i>IFIT3</i>  | 7.04        | 7.98E-81              |
| <i>IRF9</i>   | 3.95        | 6.87E-57              | <i>IFITM1</i> | 3.68        | 2.38E-46              | <i>IRF9</i>     | 3.85        | 8.76E-65    | <i>IFIT3</i>    | 7.04        | 7.98E-81              | <i>OAS1</i>   | 5.90        | 1.20E-79              |
| <i>IFIT3</i>  | 7.15        | 3.16E-54              | <i>ISG15</i>  | 6.81        | 2.47E-46              | <i>IFIT3</i>    | 6.85        | 1.28E-59    | <i>OAS1</i>     | 5.90        | 1.20E-79              | <i>IFITM1</i> | 4.00        | 1.81E-79              |
| <i>OAS1</i>   | 5.97        | 2.83E-53              | <i>MX2</i>    | 4.60        | 1.08E-44              | <i>OAS1</i>     | 5.55        | 5.88E-55    | <i>IFITM1</i>   | 4.00        | 1.81E-79              | <i>IRF9</i>   | 3.65        | 6.74E-75              |
| <i>RSAD2</i>  | 5.93        | 1.45E-48              | <i>OAS3</i>   | 4.89        | 2.36E-43              | <i>RSAD2</i>    | 5.62        | 5.70E-52    | <i>IRF9</i>     | 3.65        | 6.74E-75              | <i>OAS3</i>   | 5.15        | 2.05E-69              |
| <i>IFITM1</i> | 3.78        | 3.35E-46              | <i>IFI27</i>  | 4.27        | 2.08E-42              | <i>IFIT5</i>    | 3.42        | 4.61E-50    | <i>OAS3</i>     | 5.15        | 2.05E-69              | <i>RSAD2</i>  | 5.67        | 3.57E-68              |
| <i>OAS3</i>   | 5.20        | 4.08E-46              | <i>OAS2</i>   | 4.91        | 1.10E-40              | <i>OASL</i>     | 6.57        | 9.90E-50    | <i>RSAD2</i>    | 5.67        | 3.57E-68              | <i>IFIT5</i>  | 3.52        | 6.05E-68              |
| <i>IFIT5</i>  | 3.55        | 3.55E-45              | <i>IFI30</i>  | 5.93        | 2.77E-39              | <i>OAS3</i>     | 4.85        | 5.79E-48    | <i>IFIT5</i>    | 3.52        | 6.05E-68              | <i>PSMB8</i>  | 3.69        | 8.89E-68              |
| <i>PSMB8</i>  | 3.71        | 7.04E-45              | <i>IFITM3</i> | 3.31        | 4.15E-39              | <i>IFITM1</i>   | 3.51        | 1.65E-47    | <i>PSMB8</i>    | 3.69        | 8.89E-68              | <i>CIITA</i>  | 1.02        | 7.67x10 <sup>-4</sup> |
| <i>CIITA</i>  | 0.96        | 1.72x10 <sup>-2</sup> | <i>CIITA</i>  | 1.07        | 2.93x10 <sup>-3</sup> | <i>CIITA</i>    | 0.35        | 0.44        | <i>CIITA</i>    | 1.02        | 7.67x10 <sup>-4</sup> |               |             |                       |

Supplementary eTable 10 Pathology domains in antisynthetase syndrome of the original cohort

|                                 | Anti-ARS antibody    |                  |                      |                      |                  |               |               |
|---------------------------------|----------------------|------------------|----------------------|----------------------|------------------|---------------|---------------|
|                                 | All ARS<br>(n = 50)  | Jo-1<br>(n = 15) | OJ<br>(n = 13)       | PL-7<br>(n = 12)     | PL-12<br>(n = 4) | EJ<br>(n = 5) | KS<br>(n = 1) |
| <b>Muscle fiber domain</b>      |                      |                  |                      |                      |                  |               |               |
| score                           | 3.3±2.2              | 2.2±1.3*         | 5.2±2.0*             | 3.3±2.5              | 1.3±0.5*         | 3.6±2.4       | 4.0           |
| <b>Inflammatory domain</b>      |                      |                  |                      |                      |                  |               |               |
| score                           | 4.5±2.9              | 3.9±2.9          | 7.2±3.0*             | 3.9±1.8              | 2.8±1.0*         | 2.8±2.4       | 2.0           |
| <b>Vascular domain</b>          |                      |                  |                      |                      |                  |               |               |
| Capillary: muscle fiber ratio   | 0.8±0.3 <sup>a</sup> | 0.9±0.5          | 0.9±0.2 <sup>b</sup> | 0.8±0.4 <sup>b</sup> | 0.7 ±0.1         | 0.7 ±0.2      | 0.8           |
| <b>Connective tissue domain</b> |                      |                  |                      |                      |                  |               |               |
| PM-Fr                           | 27 (54.0)            | 6 (40)           | 9 (69.2)             | 7 (58.3)             | 3 (75.0)         | 2 (40.0)      | 0             |
| PM-ALP                          | 29 (58.0)            | 6 (40)           | 10 (76.9)            | 8 (66.7)             | 0*               | 4 (80.0)      | 1 (100.0)     |
| Endomysial fibrosis             | 3 (6.0)              | 0                | 1 (7.7)              | 1 (8.3)              | 0                | 1 (20.0)      | 0             |

Continuous data is shown as mean and ± standard deviation while categorical data is reported as number and (percentage).

Abbreviations: ARS, anti-tRNA synthetase; PM-Fr, perimysial connective tissue fragmentation; PM-ALP, increased perimysial alkaline phosphatase activity

<sup>a</sup>Two cases were excluded from analysis due to artifacts

<sup>b</sup>One case was excluded from analysis due to artifacts

**Supplementary eTable 11 Immunohistochemical feature in antisynthetase syndrome of the original cohort**

|                                                     | Anti-ARS antibody   |                  |                |                  |                  |               |               |
|-----------------------------------------------------|---------------------|------------------|----------------|------------------|------------------|---------------|---------------|
|                                                     | All ARS<br>(n = 50) | Jo-1<br>(n = 15) | OJ<br>(n = 13) | PL-7<br>(n = 12) | PL-12<br>(n = 4) | EJ<br>(n = 5) | KS<br>(n = 1) |
| HLA-ABC expression                                  | 49 (98.0)           | 14 (93.3)        | 13 (100.0)     | 12 (100.0)       | 4 (100.0)        | 5 (100.0)     | 1 (100.0)     |
| HLA-ABC expression with PF enhancement              | 2 (4.0)             | 2 (13.3)         | 0              | 0                | 0                | 0             | 0             |
| HLA-DR expression                                   | 27 (54.0)           | 9 (60.0)         | 8 (61.5)       | 4 (33.3)         | 2 (50.0)         | 3 (60.0)      | 1 (100.0)     |
| HLA-DR expression with perifascicular pattern (4+5) | 16 (32.0)           | 8 (53.3)*        | 4 (30.8)       | 0*               | 2 (50.0)         | 2 (40.0)      | 0             |
| MAC capillary deposition                            | 28 (56.0)           | 12 (80.0)*       | 7 (53.8)       | 5 (41.7)         | 2 (50.0)         | 2 (40.0)      | 0             |
| MAC capillary deposition in PF area                 | 2 (4.0)             | 1 (6.7)*         | 1 (7.7)*       | 0*               | 0*               | 0*            | 0             |
| MAC sarcolemmal deposition                          | 19 (38.0)           | 4 (26.7)         | 7 (53.8)       | 5 (41.7)         | 0                | 3 (60)        | 0             |
| MAC sarcolemmal deposition in PF area               | 14 (28.0)           | 2 (13.3)         | 6 (46.2)       | 4 (33.3)         | 0                | 2 (40.0)      | 0             |
| MxA expression                                      | 1 (2.0)             | 0                | 0              | 1 (8.3)          | 0                | 0             | 0             |

Continuous data is shown as mean and  $\pm$  standard deviation while categorial data is reported as number and (percentage).

Abbreviations: ARS, anti-tRNA synthetase; HLA, human leukocyte antigen; PF, perifascicular area; MAC, membrane attack complex; MxA, myxovirus resistant protein A

\*p < 0.05 compared to the other antibody subtype

### Normal

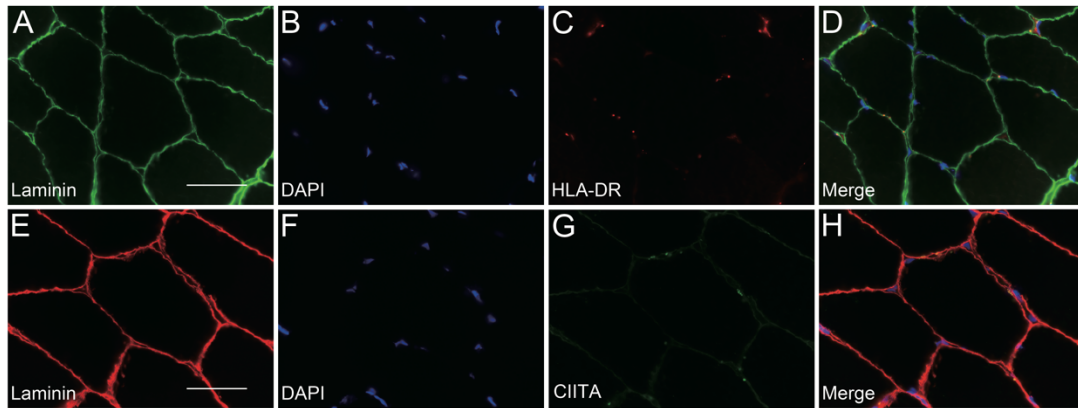

### Anti-Jo1 ASS

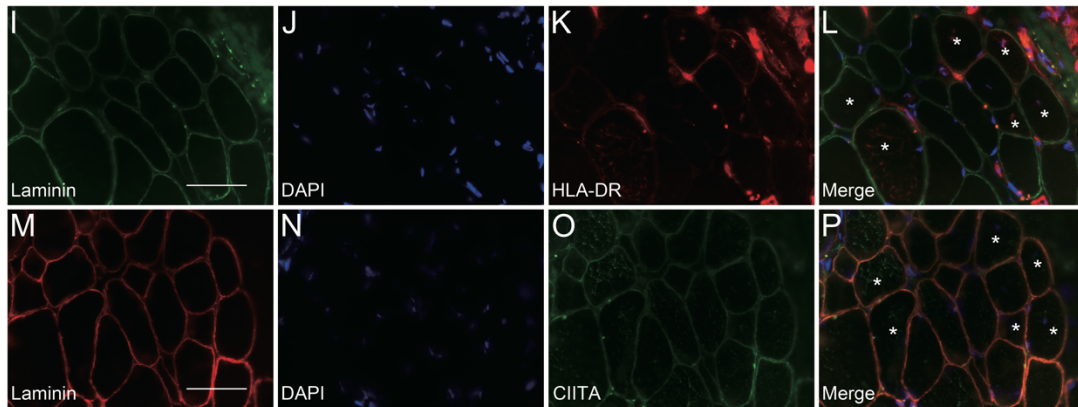

### Supplementary efigure 1 CIITA and HLA-DR expression

Normal muscle biopsy (**A-H**): Staining for HLA-DR and CIITA are negative in normal muscle biopsy. Serialized section of anti-Jo-1 ASS (**I-P**): Some fibers show HLA-DR and CIITA expression; co-expression is focally observed (white asterisk, **L** and **P**).

**Note:** A-P bar = 50 $\mu$ m; A, E, I, M: laminin; B, F, J, N: DAPI; C, K: HLA-DR (human leukocyte antigen-DR, major histocompatibility complex class II); G, O: CIITA (major histocompatibility complex class II activator); D,H,L,P: merge.
